# Supplementary material for: ¿Y ahora, quién podrá defendernos? The Inefficacy of Brazilian Conservation Areas in Safeguarding Bat Biodiversity
Source: Research Square preprint supplement (doi:10.21203/rs.3.rs-3731080/v1), 2023-12-13
Supplement: Supplementary file 1 [file 00a239f63b48ee6dfe6c9e58.xlsx]

## Sheet: Table S1
Familia	Subfamilia	Gênero	Espécie com Autor	Guilda Trófica	Classificação IUCN	Número de Pontos
Vespertilionidae	Vespertilioninae	Aeorestes	Aeorestes egregius (Peters, 1870)	Insetívoro aéreo	DD	9
Vespertilionidae	Vespertilioninae	Aeorestes	Aeorestes villosissimus (E. Geoffroy, 1806)	Insetívoro	LC	22
Phyllostomidae	Stenodermatinae	Ametrida	Ametrida centurio (Gray, 1847)	Frugívoro	LC	88
Phyllostomidae	Glossophaginae	Anoura	Anoura caudifer (E. Geoffroy, 1818)	Nectarívoro	LC	378
Phyllostomidae	Glossophaginae	Anoura	Anoura geoffroyi (Peters, 1868)	Nectarívoro	LC	748
Phyllostomidae	Stenodermatinae	Artibeus	Artibeus anderseni (Osgood, 1916)	Frugívoro	LC	179
Phyllostomidae	Stenodermatinae	Artibeus	Artibeus bogotensis (K. Andersen, 1906)	Frugívoro	LC	69
Phyllostomidae	Stenodermatinae	Artibeus	Artibeus cinereus (Gervais, 1856)	Frugívoro	LC	318
Phyllostomidae	Stenodermatinae	Artibeus	Artibeus concolor (Peters, 1865)	Frugívoro	LC	82
Phyllostomidae	Stenodermatinae	Artibeus	Artibeus fimbriatus (Gray, 1838)	Frugívoro	LC	80
Phyllostomidae	Stenodermatinae	Artibeus	Artibeus gnomus (Handley, 1987)	Frugívoro	LC	139
Phyllostomidae	Stenodermatinae	Artibeus	Artibeus lituratus (Olfers, 1818)	Frugívoro	LC	2360
Phyllostomidae	Stenodermatinae	Artibeus	Artibeus obscurus (Schinz, 1821)	Frugívoro	LC	454
Phyllostomidae	Stenodermatinae	Artibeus	Artibeus planirostris (Spix, 1823)	Frugívoro	LC	671
Phyllostomidae	Carolliinae	Carollia	Carollia benkeithi (Solari and Baker, 2006)	Frugívoro	LC	21
Phyllostomidae	Carolliinae	Carollia	Carollia brevicaudum (Schinz, 1821)	Frugívoro	LC	1223
Phyllostomidae	Carolliinae	Carollia	Carollia perspicillata (Linnaeus, 1758)	Frugívoro	LC	2062
Emballonuridae	Emballonurinae	Centronycteris	Centronycteris maximiliani (J. Fischer, 1829)	Insetívoro Aéreo	LC	20
Phyllostomidae	Stenodermatinae	Chiroderma	Chiroderma doriae (Thomas, 1891)	Frugivoro	LC	33
Phyllostomidae	Stenodermatinae	Chiroderma	Chiroderma trinitatum (Goodwin, 1958)	Frugivoro	LC	148
Phyllostomidae	Stenodermatinae	Chiroderma	Chiroderma villosum (Peters, 1860)	Frugivoro	LC	410
Phyllostomidae	Glossophaginae	Choeroniscus	Choeroniscus godmani (Thomas, 1903)	Nectarívoro	LC	114
Phyllostomidae	Glossophaginae	Choeroniscus	Choeroniscus minor (Peters, 1868)	Nectarívoro	LC	69
Phyllostomidae	Phyllostominae	Chrotopterus	Chrotopterus auritus (Peters, 1856)	Carnívoro	LC	239
Emballonuridae	Emballonurinae	Cormura	Cormura brevirostris (Wagner, 1843)	Insetívoro Aéreo	LC	112
Molossidae	Molossinae	Cynomops	Cynomops abrasus (Temminck, 1827)	Insetívoro Aéreo	DD	63
Molossidae	Molossinae	Cynomops	Cynomops greenhalli (Goodwin, 1958)	Insetívoro Aéreo	LC	23
Molossidae	Molossinae	Cynomops	Cynomops mastivus (Thomas, 1911)	Insetívoro Aéreo	DD	20
Molossidae	Molossinae	Cynomops	Cynomops milleri (Osgood, 1914)	Insetívoro Aéreo	LC	19
Molossidae	Molossinae	Cynomops	Cynomops planirostris (Peters, 1866)	Insetívoro Aéreo	LC	90
Emballonuridae	Emballonurinae	Cyttarops	Cyttarops alecto (Thomas, 1913)	Insetívoro Aéreo	LC	17
Vespertilionidae	Vespertilioninae	Dasypterus	Dasypterus ega (Gervais, 1856)	Insetívoro Aéreo	LC	305
Phyllostomidae	Desmodontinae	Desmodus	Desmodus rotundus (E. Geoffroy, 1810)	Hematófago	LC	2231
Phyllostomidae	Desmodontinae	Diaemus	Diaemus youngii (Jentink, 1893)	Hematófago	LC	81
Emballonuridae	Emballonurinae	Diclidurus	Diclidurus albus (Wied-Neuwied, 1820)	Insetívoro Aéreo	LC	65
Emballonuridae	Emballonurinae	Diclidurus	Diclidurus ingens (Hernández-Camacho, 1955)	Insetívoro Aéreo	DD	11
Emballonuridae	Emballonurinae	Diclidurus	Diclidurus isabella (Thomas, 1920)	Insetívoro Aéreo	LC	9
Emballonuridae	Emballonurinae	Diclidurus	Diclidurus scutatus (Peters, 1869)	Insetívoro Aéreo	LC	16
Phyllostomidae	Desmodontinae	Diphylla	Diphylla ecaudata (Spix, 1823)	Hematófago	LC	252
Phyllostomidae	Glossophaginae	Dryadonycteris	Dryadonycteris capixaba	Nectarívoro	DD	1
			(Nogueira, Lima, Peracchi and Simmons, 2012)
Vespertilionidae	Vespertilioninae	Eptesicus	Eptesicus brasiliensis (Desmarest, 1819)	Insetívoro Aéreo	LC	208
Vespertilionidae	Vespertilioninae	Eptesicus	Eptesicus chiriquinus (Thomas, 1920)	Insetívoro Aéreo	LC	33
Vespertilionidae	Vespertilioninae	Eptesicus	Eptesicus diminutus (Osgood, 1915)	Insetívoro	LC	48
Vespertilionidae	Vespertilioninae	Eptesicus	Eptesicus furinalis (d'Orbigny, 1847)	Insetívoro Aéreo	LC	405
Vespertilionidae	Vespertilioninae	Eptesicus	Eptesicus taddeii (Miranda, Bernardi and Passos, 2006)	Insetívoro	DD	1
Molossidae	Molossinae	Eumops	Eumops auripendulus (Shaw, 1800)	Insetívoro Aéreo	LC	100
Molossidae	Molossinae	Eumops	Eumops bonariensis (Peters, 1874)	Insetívoro Aéreo	LC	93
Molossidae	Molossinae	Eumops	Eumops chimaera (Gregorin, Moras, Acosta, Vasconcellos, Poma, dos Santos & Paca, 2016)	Insetívoro Aéreo	0	3
Molossidae	Molossinae	Eumops	Eumops dabbenei (Thomas, 1914)	Insetívoro	LC	8
Molossidae	Molossinae	Eumops	Eumops delticus (Thomas, 1923)	Insetívoro	DD	11
Molossidae	Molossinae	Eumops	Eumops glaucinus (Wagner, 1843)	Insetívoro	LC	145
Molossidae	Molossinae	Eumops	Eumops hansae (Sanborn, 1932)	Insetívoro	LC	28
Molossidae	Molossinae	Eumops	Eumops maurus (Thomas, 1901)	Insetívoro	DD	16
Molossidae	Molossinae	Eumops	Eumops patagonicus (Thomas, 1924)	Insetívoro	LC	44
Molossidae	Molossinae	Eumops	Eumops perotis (Schinz, 1821)	Insetívoro Aéreo	LC	92
Molossidae	Molossinae	Eumops	Eumops trumbulli (Thomas, 1901)	Insetívoro Aéreo	LC	12
Furipteridae	0	Furipterus	Furipterus horrens (F. Cuvier, 1828)	Insetívoro Aéreo	LC	42
Phyllostomidae	Phyllostominae	Gardnerycteris	Gardnerycteris crenulatum (E. Geoffroy, 1803)	Frugívoro	LC	250
Phyllostomidae	Glossophaginae	Glossophaga	Glossophaga commissarisi (Gardner, 1962)	Nectarívoro	LC	420
Phyllostomidae	Glossophaginae	Glossophaga	Glossophaga longirostris (Miller, 1898)	Frugívoro	LC	227
Phyllostomidae	Glossophaginae	Glossophaga	Glossophaga soricina (Pallas, 1766)	Nectarívoro	LC	2365
Phyllostomidae	Glyphonycterinae	Glyphonycteris	Glyphonycteris behnii (Peters, 1865)	Onívoro	DD	1
Phyllostomidae	Glyphonycterinae	Glyphonycteris	Glyphonycteris daviesi (Hill, 1964)	Insetívoro (Gleaning)	LC	17
Phyllostomidae	Glyphonycterinae	Glyphonycteris	Glyphonycteris sylvestris (Thomas, 1896)	Insetívoro (Gleaning)	LC	54
Vespertilionidae	Vespertilioninae	Histiotus	Histiotus alienus (Thomas, 1916)	Insetívoro	DD	2
Vespertilionidae	Vespertilioninae	Histiotus	Histiotus diaphanopterus (Feijó, Da Rocha and Althoff, 2015)	Insetívoro	0	8
Vespertilionidae	Vespertilioninae	Histiotus	Histiotus laephotis (Thomas, 1916)	Insetívoro Aéreo	LC	7
Vespertilionidae	Vespertilioninae	Histiotus	Histiotus montanus (Philippi and Landbeck, 1861)	Insetívoro Aéreo	LC	118
Vespertilionidae	Vespertilioninae	Histiotus	Histiotus velatus (I. Geoffroy, 1824)	Insetívoro Aéreo	DD	50
Phyllostomidae	Lonchophyllinae	Hsunycteris	Hsunycteris pattoni (Woodman and Timm, 2006)	Nectarívoro	DD	4
Phyllostomidae	Lonchophyllinae	Hsunycteris	Hsunycteris thomasi (J. A. Allen, 1904)	Nectarívoro	LC	201
Phyllostomidae	Micronycterinae	Lampronycteris	Lampronycteris brachyotis (Dobson, 1879)	Insetívoro (Gleaning)	LC	79
Vespertilionidae	Vespertilioninae	Lasiurus	Lasiurus blossevillii (Lesson and Garnot, 1826)	Insetívoro	LC	290
Vespertilionidae	Vespertilioninae	Lasiurus	Lasiurus castaneus (Handley, 1960)	Insetívoro	DD	5
Vespertilionidae	Vespertilioninae	Lasiurus	Lasiurus ebenus (Fazzolari-Corrêa, 1994)	Insetívoro Aéreo	DD	1
Phyllostomidae	Glossophaginae	Lichonycteris	Lichonycteris degener (Miller, 1931)	Nectarívoro	LC	1
Phyllostomidae	Lonchophyllinae	Lionycteris	Lionycteris spurrelli (Thomas, 1913)	Nectarívoro	LC	92
Phyllostomidae	Lonchophyllinae	Lonchophylla	Lonchophylla bokermanni (Sazima, Vizotto and Taddei, 1978)	Nectarívoro	EN	7
Phyllostomidae	Lonchophyllinae	Lonchophylla	Lonchophylla dekeyseri (Taddei, Vizotto and Sazima, 1983)	Nectarívoro	EN	6
Phyllostomidae	Lonchophyllinae	Lonchophylla	Lonchophylla inexpectata (Moratelli and Dias, 2015)	Nectarívoro	0	4
Phyllostomidae	Lonchophyllinae	Lonchophylla	Lonchophylla mordax (Thomas, 1903)	Nectarívoro	NT	23
Phyllostomidae	Lonchophyllinae	Lonchophylla	Lonchophylla peracchii (Dias, Esbérard and Moratelli, 2013)	Nectarívoro	LC	8
Phyllostomidae	Lonchorhininae	Lonchorhina	Lonchorhina aurita (Tomes, 1863)	Insetívoro Aéreo	LC	166
Phyllostomidae	Lonchorhininae	Lonchorhina	Lonchorhina inusitata (Handley and Ochoa, 1997)	Insetívoro (Gleaning)	DD	14
Phyllostomidae	Phyllostominae	Lophostoma	Lophostoma brasiliense (Peters, 1867)	Insetívoro (Gleaning)	LC	135
Phyllostomidae	Phyllostominae	Lophostoma	Lophostoma carrikeri (J. A. Allen, 1910)	Onívoro	LC	24
Phyllostomidae	Phyllostominae	Lophostoma	Lophostoma schulzi (Genoways and Williams, 1980)	Insetívoro	LC	19
Phyllostomidae	Phyllostominae	Lophostoma	Lophostoma silvicola (d'Orbigny, 1836)	Insetívoro (Gleaning)	LC	276
Phyllostomidae	Phyllostominae	Macrophyllum	Macrophyllum macrophyllum (Schinz, 1821)	Nectarívoro	LC	104
Phyllostomidae	Stenodermatinae	Mesophylla	Mesophylla macconnelli (Thomas, 1901)	Frugívoro	LC	234
Phyllostomidae	Micronycterinae	Micronycteris	Micronycteris hirsuta (Peters, 1869)	Insetívoro (Gleaning)	LC	73
Phyllostomidae	Micronycterinae	Micronycteris	Micronycteris megalotis (Gray, 1842)	Insetívoro (Gleaning)	LC	429
Phyllostomidae	Micronycterinae	Micronycteris	Micronycteris microtis (Miller, 1898)	Insetívoro (Gleaning)	LC	341
Phyllostomidae	Micronycterinae	Micronycteris	Micronycteris minuta (Gervais, 1856)	Insetívoro (Gleaning)	LC	159
Phyllostomidae	Micronycterinae	Micronycteris	Micronycteris sanborni (Simmons, 1996)	Insetívoro (Gleaning)	LC	27
Phyllostomidae	Micronycterinae	Micronycteris	Micronycteris schmidtorum (Sanborn, 1935)	Insetívoro (Gleaning)	LC	71
Phyllostomidae	Phyllostominae	Mimon	Mimon bennettii (Gray, 1838)	Insetívoro (Gleaning)	LC	100
Molossidae	Molossinae	Molossops	Molossops neglectus (Williams and Genoways, 1980)	Insetívoro Aéreo	DD	14
Molossidae	Molossinae	Molossops	Molossops temminckii (Burmeister, 1854)	Insetívoro Aéreo	LC	138
Molossidae	Molossinae	Molossus	Molossus aztecus (Saussure, 1860)	Insetívoro Aéreo	LC	25
Molossidae	Molossinae	Molossus	Molossus coibensis (J. A. Allen, 1904)	Insetívoro Aéreo	LC	48
Molossidae	Molossinae	Molossus	Molossus currentium (Thomas, 1901)	Insetívoro Aéreo	LC	65
Molossidae	Molossinae	Molossus	Molossus fluminensis (Lataste, 1891)	Insetívoro	0	1
Molossidae	Molossinae	Molossus	Molossus molossus (Pallas, 1766)	Insetívoro Aéreo (high-flyer)	LC	984
Molossidae	Molossinae	Molossus	Molossus pretiosus (Miller, 1902)	Insetívoro Aéreo	LC	46
Molossidae	Molossinae	Molossus	Molossus rufus (E. Geoffroy, 1805)	Insetívoro Aéreo (uncluttered space)	LC	700
Vespertilionidae	Myotinae	Myotis	Myotis albescens (E. Geoffroy, 1806)	Insetívoro	LC	246
Vespertilionidae	Myotinae	Myotis	Myotis izecksohni (Moratelli, Peracchi, Dias and de Oliveira, 2011)	Insetívoro	DD	1
Vespertilionidae	Myotinae	Myotis	Myotis lavali (Moratelli, Peracchi, Dias and de Oliveira, 2011)	Insetívoro	LC	3
Vespertilionidae	Myotinae	Myotis	Myotis levis (I. Geoffroy, 1824)	Insetívoro Aéreo	LC	110
Vespertilionidae	Myotinae	Myotis	Myotis nigricans (Schinz, 1821)	Insetívoro Aéreo (high-flyer)	LC	849
Vespertilionidae	Myotinae	Myotis	Myotis riparius (Handley, 1960)	Insetívoro Aéreo	LC	226
Vespertilionidae	Myotinae	Myotis	Myotis ruber (E. Geoffroy, 1806)	Insetívoro Aéreo	NT	26
Vespertilionidae	Myotinae	Myotis	Myotis simus (Thomas, 1901)	Insetívoro Aéreo	DD	28
Natalidae	0	Natalus	Natalus macrourus (Ruschi, 1951)	Insetívoro Aéreo (high-flyer)	NT	9
Phyllostomidae	Glyphonycterinae	Neonycteris	Neonycteris pusilla (Sanborn, 1949)	Onívoro	DD	2
Molossidae	Molossinae	Neoplatymops	Neoplatymops mattogrossensis (Vieira, 1942)	Insetívoro Aéreo	LC	20
Noctilionidae	0	Noctilio	Noctilio albiventris (Desmarest, 1818)	Insetívoro Aéreo	LC	305
Noctilionidae	0	Noctilio	Noctilio leporinus (Linnaeus, 1758)	Carnívoro	LC	467
Molossidae	Molossinae	Nyctinomops	Nyctinomops aurispinosus (Peale, 1848)	Insetívoro Aéreo	LC	58
Molossidae	Molossinae	Nyctinomops	Nyctinomops laticaudatus (E. Geoffroy, 1805)	Insetívoro Aéreo	LC	173
Molossidae	Molossinae	Nyctinomops	Nyctinomops macrotis (Gray, 1840)	Insetívoro Aéreo	LC	112
Emballonuridae	Emballonurinae	Peropteryx	Peropteryx kappleri (Peters, 1867)	Insetívoro Aéreo	LC	70
Emballonuridae	Emballonurinae	Peropteryx	Peropteryx leucoptera (Peters, 1867)	Insetívoro Aéreo	LC	14
Emballonuridae	Emballonurinae	Peropteryx	Peropteryx macrotis (Wagner, 1843)	Insetívoro Aéreo	LC	289
Emballonuridae	Emballonurinae	Peropteryx	Peropteryx pallidoptera (Lim, Engstrom, Reid, Simmons, Voss and Fleck, 2010)	Insetívoro Aéreo	DD	1
Emballonuridae	Emballonurinae	Peropteryx	Peropteryx trinitatis (Miller, 1899)	Insetívoro Aéreo	DD	27
Phyllostomidae	Phyllostominae	Phylloderma	Phylloderma stenops (Peters, 1865)	Insetívoro (Gleaning)	LC	120
Phyllostomidae	Phyllostominae	Phyllostomus	Phyllostomus discolor (Wagner, 1843)	Onívoro	LC	578
Phyllostomidae	Phyllostominae	Phyllostomus	Phyllostomus elongatus (E. Geoffroy, 1810)	Onívoro	LC	241
Phyllostomidae	Phyllostominae	Phyllostomus	Phyllostomus hastatus (Pallas, 1767)	Onívoro	LC	615
Phyllostomidae	Phyllostominae	Phyllostomus	Phyllostomus latifolius (Thomas, 1901)	Frugívoro	LC	23
Phyllostomidae	Stenodermatinae	Platyrrhinus	Platyrrhinus angustirostris (Velazco, Gardner and Patterson, 2010)	Frugívoro	LC	28
Phyllostomidae	Stenodermatinae	Platyrrhinus	Platyrrhinus aurarius (Handley and Ferris, 1972)	Frugívoro	LC	18
Phyllostomidae	Stenodermatinae	Platyrrhinus	Platyrrhinus brachycephalus (Rouk and Carter, 1972)	Frugívoro	LC	136
Phyllostomidae	Stenodermatinae	Platyrrhinus	Platyrrhinus fusciventris (Velazco, Gardner and Patterson, 2010)	Frugívoro	LC	34
Phyllostomidae	Stenodermatinae	Platyrrhinus	Platyrrhinus incarum (Thomas, 1912)	Frugívoro	LC	46
Phyllostomidae	Stenodermatinae	Platyrrhinus	Platyrrhinus infuscus (Peters, 1880)	Frugívoro	LC	116
Phyllostomidae	Stenodermatinae	Platyrrhinus	Platyrrhinus lineatus (E. Geoffroy, 1810)	Frugívoro	LC	261
Phyllostomidae	Stenodermatinae	Platyrrhinus	Platyrrhinus recifinus (Thomas, 1901)	Frugívoro	LC	27
Molossidae	Molossinae	Promops	Promops centralis (Thomas, 1915)	Insetívoro Aéreo	LC	83
Molossidae	Molossinae	Promops	Promops nasutus (Spix, 1823)	Insetívoro Aéreo	LC	40
Mormoopidae	0	Pteronotus	Pteronotus alitonus (Pavan, Bobrowiec and Percequillo, 2018)	Insetívoro	0	29
Mormoopidae	0	Pteronotus	Pteronotus gymnonotus (Natterer, 1843)	Insetívoro	LC	62
Mormoopidae	0	Pteronotus	Pteronotus personatus (Wagner, 1843)	Insetívoro Aéreo	LC	278
Mormoopidae	0	Pteronotus	Pteronotus rubiginosus (Wagner, 1843)	Insetívoro Aéreo	LC	88
Phyllostomidae	Stenodermatinae	Pygoderma	Pygoderma bilabiatum (Wagner, 1843)	Frugívoro	LC	72
Phyllostomidae	Rhinophyllinae	Rhinophylla	Rhinophylla fischerae (Carter, 1966)	Frugívoro	LC	92
Phyllostomidae	Rhinophyllinae	Rhinophylla	Rhinophylla pumilio (Peters, 1865)	Frugívoro	LC	274
Vespertilionidae	Vespertilioninae	Rhogeessa	Rhogeessa hussoni (Genoways and Baker, 1996)	Insetívoro	DD	14
Vespertilionidae	Vespertilioninae	Rhogeessa	Rhogeessa io (Thomas, 1903)	Insetívoro	LC	38
Emballonuridae	Emballonurinae	Rhynchonycteris	Rhynchonycteris naso (Wied-Neuwied, 1820)	Insetívoro Aéreo	LC	654
Emballonuridae	Emballonurinae	Saccopteryx	Saccopteryx bilineata (Temminck, 1838)	Insetívoro Aéreo	LC	798
Emballonuridae	Emballonurinae	Saccopteryx	Saccopteryx canescens Thomas, 1901	Insetívoro Aéreo	LC	67
Emballonuridae	Emballonurinae	Saccopteryx	Saccopteryx gymnura (Thomas, 1901)	Insetívoro Aéreo	DD	6
Emballonuridae	Emballonurinae	Saccopteryx	Saccopteryx leptura (Schreber, 1774)	Insetívoro Aéreo	LC	262
Phyllostomidae	Glossophaginae	Scleronycteris	Scleronycteris ega (Thomas, 1912)	Frugívoro	DD	3
Phyllostomidae	Stenodermatinae	Sphaeronycteris	Sphaeronycteris toxophyllum (Peters, 1882)	Frugívoro	LC	70
Phyllostomidae	Stenodermatinae	Sturnira	Sturnira giannae (Velazco and Patterson, 2019)	Frugívoro	0	54
Phyllostomidae	Stenodermatinae	Sturnira	Sturnira lilium (E. Geoffroy, 1810)	Frugívoro	LC	1385
Phyllostomidae	Stenodermatinae	Sturnira	Sturnira magna (de la Torre, 1966)	Frugívoro	LC	75
Phyllostomidae	Stenodermatinae	Sturnira	Sturnira tildae (de la Torre, 1959)	Frugívoro	LC	229
Molossidae	Molossinae	Tadarida	Tadarida brasiliensis (I. Geoffroy, 1824)	Insetívoro Aéreo	LC	991
Thyropteridae	0	Thyroptera	Thyroptera devivoi (Gregorin, Goncalves, Lim and Engstrom, 2006)	Insetívoro	DD	10
Thyropteridae	0	Thyroptera	Thyroptera discifera (Lichtenstein and Peters, 1855)	Insetívoro Aéreo	LC	22
Thyropteridae	0	Thyroptera	Thyroptera lavali (Pine, 1993)	Insetívoro Aéreo	DD	22
Thyropteridae	0	Thyroptera	Thyroptera tricolor (Spix, 1823)	Insetívoro Aéreo	LC	120
Thyropteridae	0	Thyroptera	Thyroptera wynneae (Velazco, Gregorin, Voss and Simmons, 2014)	Insetívoro Aéreo	DD	10
Phyllostomidae	Phyllostominae	Tonatia	Tonatia bidens (Spix, 1823)	Insetívoro (Gleaning)	DD	88
Phyllostomidae	Phyllostominae	Tonatia	Tonatia maresi (Williams, Willig and Reid, 1995)	Insetívoro	0	1
Phyllostomidae	Phyllostominae	Trachops	Trachops cirrhosus (Spix, 1823)	Insetívoro (Gleaning)	LC	445
Phyllostomidae	Glyphonycterinae	Trinycteris	Trinycteris nicefori (Sanborn, 1949)	Insetívoro (Gleaning)	LC	129
Phyllostomidae	Stenodermatinae	Uroderma	Uroderma bilobatum (Peters, 1866)	Frugivoro	LC	841
Phyllostomidae	Stenodermatinae	Uroderma	Uroderma magnirostrum (Davis, 1968)	Frugivoro	LC	212
Phyllostomidae	Stenodermatinae	Vampyressa	Vampyressa pusilla (Wagner, 1843)	Frugivoro	DD	184
Phyllostomidae	Stenodermatinae	Vampyressa	Vampyressa thyone (Thomas, 1909)	Frugivoro	LC	195
Phyllostomidae	Stenodermatinae	Vampyriscus	Vampyriscus bidens (Dobson, 1878)	Frugivoro	LC	120
Phyllostomidae	Stenodermatinae	Vampyriscus	Vampyriscus brocki (Peterson, 1968)	Frugivoro	LC	21
Phyllostomidae	Stenodermatinae	Vampyrodes	Vampyrodes caraccioli (Thomas, 1889)	Frugivoro	LC	129
Phyllostomidae	Phyllostominae	Vampyrum	Vampyrum spectrum (Linnaeus, 1758)	Carnívoro	NT	88
Phyllostomidae	Glossophaginae	Xeronycteris	Xeronycteris vierai (Gregorin & Ditchfield, 2005)	Nectarívoro	0	3

## Sheet: Table S2
Territorial extension	Unit type	Taxonomic grouping		OBS	DP	Aleat	DP	N	p
Brazil	UUS+UPI+TI	Total		0.675695	0.179109	0.610698	0.192923	28862	1
		Guild	Carnivore	0.683655	0.173413	0.615469	0.170116	28862	1	Insectivorous* - Insectivorous without gleaner
			Frugivore	0.699321	0.179223	0.629254	0.194421	28862	1
			Gleaner	0.693754	0.18084	0.611724	0.190183	28862	1
			Hematophagous	0.604742	0.163482	0.583216	0.177237	28862	1
			Insectivorous	0.668187	0.188436	0.606829	0.204379	28862	1
			Nectarivore	0.660865	0.152089	0.628588	0.17078	28862	1
			Insectivorous*	0.645986	0.191184	0.585951	0.203655	28862	1
		IUCN	DD	0.752195	0.151105	0.714465	0.170597	28862	1
			EN	0.723722	0.200654	0.772774	0.208015	28862	0
			LC	0.652854	0.191132	0.577394	0.201031	28862	1
			NT	0.6039	0.203124	0.682068	0.204384	28862	0
	UUS	Total		0.666331	0.179756	0.610701	0.192928	10271	1
		Guild	Carnivore	0.674779	0.174789	0.615481	0.170119	10271	1
			Frugivore	0.691261	0.179862	0.629262	0.194402	10271	1
			Gleaner	0.680854	0.184701	0.61172	0.190195	10271	1
			Hematophagous	0.584915	0.177817	0.583255	0.177244	10271	0.851085
			Insectivorous	0.658844	0.187927	0.606816	0.204382	10271	1
			Nectarivore	0.661788	0.166963	0.628571	0.170793	10271	1
			Insectivorous*	0.636952	0.190597	0.585942	0.203667	10271	1
		IUCN	DD	0.754918	0.157813	0.714484	0.170603	10271	1
			EN	0.739576	0.196801	0.7728	0.207981	10271	0
			LC	0.639405	0.189019	0.577382	0.201046	10271	1
			NT	0.629605	0.208967	0.682065	0.204364	10271	0
	UPI	Total		0.666368	0.188093	0.610712	0.192914	6618	1
		Guild	Carnivore	0.654528	0.17845	0.615499	0.170094	6618	1
			Frugivore	0.676917	0.176064	0.629292	0.194409	6618	1
			Gleaner	0.671419	0.190635	0.611752	0.190197	6618	1
			Hematophagous	0.598656	0.178203	0.58322	0.177217	6618	1
			Insectivorous	0.670809	0.204739	0.606859	0.204374	6618	1
			Nectarivore	0.659294	0.168466	0.628607	0.170793	6618	1
			Insectivorous*	0.652815	0.203185	0.585943	0.203659	6618	1
		IUCN	DD	0.743876	0.164488	0.714474	0.170608	6618	1
			EN	0.725067	0.239809	0.772809	0.207947	6618	0
			LC	0.639666	0.193705	0.577423	0.201031	6618	1
			NT	0.629491	0.221486	0.682072	0.204379	6618	0
	TI	Total		0.688884	0.172528	0.610694	0.192931	11973	1
		Guild	Carnivore	0.707368	0.166096	0.615487	0.170099	11973	1
			Frugivore	0.718619	0.178449	0.62926	0.19442	11973	1
			Gleaner	0.717166	0.168879	0.61172	0.190184	11973	1
			Hematophagous	0.625114	0.13777	0.583229	0.177229	11973	1
			Insectivorous	0.674753	0.178924	0.606843	0.204395	11973	1
			Nectarivore	0.660942	0.127122	0.628591	0.170772	11973	1
			Insectivorous*	0.649961	0.184451	0.585916	0.203668	11973	1
		IUCN	DD	0.754456	0.136656	0.714471	0.170619	11973	1
			EN	0.70938	0.177842	0.77278	0.207987	11973	0
			LC	0.67168	0.18993	0.577413	0.201032	11973	1
			NT	0.567705	0.1807	0.68205	0.204388	11973	0
Amazon	UUS+UPI+TI	Total		0.72233	0.138289	0.610707	0.192925	20959	1
		Guild	Carnivore	0.749791	0.143661	0.615472	0.170109	20959	1
			Frugivore	0.748983	0.139533	0.629263	0.194416	20959	1
			Gleaner	0.75854	0.144592	0.611731	0.190186	20959	1
			Hematophagous	0.617204	0.128212	0.583232	0.177231	20959	1
			Insectivorous	0.717659	0.145869	0.606848	0.204378	20959	1
			Nectarivore	0.683475	0.12311	0.6286	0.170792	20959	1
			Insectivorous*	0.690886	0.153272	0.585964	0.203665	20959	1
		IUCN	DD	0.78728	0.128087	0.714456	0.170609	20959	1
			EN	0.694344	0.165872	0.772776	0.208008	20959	0
			LC	0.705187	0.147982	0.577359	0.201022	20959	1
			NT	0.530973	0.171851	0.682046	0.204383	20959	0
	UUS	Total		0.728503	0.116065	0.610724	0.192913	6652	1
		Guild	Carnivore	0.765805	0.130089	0.615475	0.170113	6652	1
			Frugivore	0.75679	0.118394	0.629258	0.194419	6652	1
			Gleaner	0.766328	0.136018	0.611724	0.19018	6652	1
			Hematophagous	0.602324	0.129126	0.583201	0.177241	6652	1
			Insectivorous	0.728078	0.11673	0.606841	0.204375	6652	1
			Nectarivore	0.696677	0.1299	0.62858	0.170772	6652	1
			Insectivorous*	0.698881	0.132761	0.585916	0.203645	6652	1
		IUCN	DD	0.802703	0.125669	0.714517	0.170611	6652	1
			EN	0.709131	0.149584	0.772788	0.208013	6652	0
			LC	0.708742	0.120386	0.577398	0.201019	6652	1
			NT	0.526097	0.171032	0.682041	0.204385	6652	0
	UPI	Total		0.718505	0.124361	0.610697	0.192934	3932	1
		Guild	Carnivore	0.749098	0.144069	0.615492	0.170128	3932	1
			Frugivore	0.729242	0.112229	0.629246	0.194375	3932	1
			Gleaner	0.771024	0.133791	0.611764	0.190186	3932	1
			Hematophagous	0.60333	0.112037	0.58323	0.17721	3932	1
			Insectivorous	0.737711	0.137928	0.606817	0.204398	3932	1
			Nectarivore	0.679598	0.123994	0.628632	0.170792	3932	1
			Insectivorous*	0.705342	0.144612	0.585877	0.203649	3932	1
		IUCN	DD	0.7988	0.124472	0.714443	0.170602	3932	1
			EN	0.684665	0.181169	0.772808	0.207945	3932	0
			LC	0.696278	0.126918	0.577343	0.201033	3932	1
			NT	0.49913	0.170241	0.682085	0.204379	3932	0
	TI	Total		0.719822	0.155247	0.610688	0.192927	10375	1
		Guild	Carnivore	0.739786	0.150715	0.615468	0.170104	10375	1
			Frugivore	0.751459	0.159314	0.629235	0.194423	10375	1
			Gleaner	0.748815	0.15297	0.611732	0.190191	10375	1
			Hematophagous	0.632002	0.13164	0.583232	0.177231	10375	1
			Insectivorous	0.70338	0.163143	0.606834	0.204397	10375	1
			Nectarivore	0.676481	0.117509	0.628584	0.170778	10375	1
			Insectivorous*	0.680281	0.167342	0.58594	0.203653	10375	1
		IUCN	DD	0.773025	0.129394	0.714455	0.170602	10375	1
			EN	0.688532	0.169092	0.772788	0.207951	10375	0
			LC	0.706284	0.169723	0.577367	0.201029	10375	1
			NT	0.546167	0.171163	0.68207	0.20439	10375	0
Caatinga	UUS+UPI+TI	Total		0.350601	0.0744757	0.610827	0.192938	1119	0
		Guild	Carnivore	0.489091	0.0752396	0.615479	0.170095	1119	0
			Frugivore	0.349014	0.105124	0.629401	0.194385	1119	0
			Gleaner	0.47494	0.077597	0.611676	0.190155	1119	0
			Hematophagous	0.384462	0.15525	0.583207	0.177219	1119	0
			Insectivorous	0.340458	0.076897	0.60685	0.204397	1119	0
			Nectarivore	0.534477	0.132697	0.628616	0.170736	1119	0
			Insectivorous*	0.344696	0.0627807	0.585992	0.203619	1119	0
		IUCN	DD	0.484106	0.108538	0.714417	0.17058	1119	0
			EN	0.794202	0.164166	0.772737	0.207947	1119	0.9999
			LC	0.31444	0.0781626	0.57738	0.201021	1119	0
			NT	0.775926	0.0841789	0.682057	0.204364	1119	1
	UUS	Total		0.35932	0.0727493	0.610638	0.192892	712	0
		Guild	Carnivore	0.480332	0.0802712	0.615486	0.170076	712	0
			Frugivore	0.350141	0.0989601	0.629338	0.194357	712	0
			Gleaner	0.488876	0.0821226	0.61182	0.190141	712	0
			Hematophagous	0.343799	0.125271	0.583177	0.177257	712	0
			Insectivorous	0.351749	0.0794262	0.606836	0.204355	712	0
			Nectarivore	0.538628	0.136963	0.628506	0.170735	712	0
			Insectivorous*	0.34673	0.0597272	0.585914	0.203628	712	0
		IUCN	DD	0.500641	0.107801	0.714502	0.170551	712	0
			EN	0.78126	0.180082	0.772643	0.207971	712	0.863486
			LC	0.321436	0.0766973	0.577466	0.201056	712	0
			NT	0.764836	0.0782995	0.68208	0.204344	712	1
	UPI	Total		0.346248	0.076977	0.610707	0.192891	331	0
		Guild	Carnivore	0.502672	0.066879	0.61534	0.170044	331	0
			Frugivore	0.359411	0.123354	0.629087	0.19431	331	0
			Gleaner	0.456237	0.0643826	0.611699	0.19009	331	0
			Hematophagous	0.412709	0.148692	0.583238	0.177193	331	0
			Insectivorous	0.330192	0.0684979	0.606689	0.204294	331	0
			Nectarivore	0.542289	0.132429	0.628508	0.17063	331	0
			Insectivorous*	0.353026	0.0643965	0.585926	0.203706	331	0
		IUCN	DD	0.469761	0.103212	0.714572	0.170429	331	0
			EN	0.818768	0.133497	0.772905	0.207416	331	1
			LC	0.313631	0.0807334	0.577302	0.200869	331	0
			NT	0.793781	0.0946308	0.682079	0.204303	331	1
	TI	Total		0.287873	0.0405551	0.610559	0.192485	76	0
		Guild	Carnivore	0.511995	0.039348	0.615718	0.169533	76	0
			Frugivore	0.293176	0.036008	0.629233	0.194007	76	0
			Gleaner	0.425837	0.0418803	0.611989	0.189588	76	0
			Hematophagous	0.642388	0.16312	0.583272	0.176668	76	0.9987
			Insectivorous	0.279392	0.0473487	0.606743	0.204075	76	0
			Nectarivore	0.461574	0.0408226	0.628646	0.170443	76	0
			Insectivorous*	0.289362	0.0569245	0.585967	0.203361	76	0
		IUCN	DD	0.39168	0.0800518	0.714528	0.170075	76	0
			EN	0.808457	0.106942	0.773479	0.205551	76	0.934893
			LC	0.252429	0.047561	0.57692	0.200651	76	0
			NT	0.802054	0.0695806	0.68173	0.204178	76	1
Cerrado	UUS+UPI+TI	Total		0.492227	0.14169	0.610721	0.192918	3547	0
		Guild	Carnivore	0.492525	0.085882	0.615563	0.170135	3547	0
			Frugivore	0.513431	0.147049	0.629215	0.194421	3547	0
			Gleaner	0.518046	0.0835991	0.611701	0.19021	3547	0
			Hematophagous	0.558804	0.159861	0.583195	0.177213	3547	0
			Insectivorous	0.48564	0.165545	0.606839	0.204372	3547	0
			Nectarivore	0.619406	0.128652	0.628661	0.170795	3547	0.00030003
			Insectivorous*	0.448602	0.161515	0.585982	0.203658	3547	0
		IUCN	DD	0.681857	0.141292	0.714475	0.170586	3547	0
			EN	0.908121	0.097092	0.772789	0.207968	3547	1
			LC	0.434877	0.142577	0.577388	0.201015	3547	0
			NT	0.766831	0.165843	0.682026	0.204383	3547	1
	UUS	Total		0.510209	0.143621	0.610696	0.192873	1369	0
		Guild	Carnivore	0.492469	0.0868221	0.615423	0.170071	1369	0
			Frugivore	0.536988	0.14867	0.629269	0.194393	1369	0
			Gleaner	0.513316	0.0929762	0.611763	0.190172	1369	0
			Hematophagous	0.53846	0.175262	0.583216	0.177163	1369	0
			Insectivorous	0.502016	0.169652	0.606871	0.204362	1369	0
			Nectarivore	0.617087	0.136576	0.62858	0.170736	1369	0.00560056
			Insectivorous*	0.464269	0.160939	0.585951	0.203628	1369	0
		IUCN	DD	0.709697	0.142556	0.714481	0.170557	1369	0.145815
			EN	0.899296	0.122633	0.772772	0.207913	1369	1
			LC	0.446804	0.147996	0.577446	0.201018	1369	0
			NT	0.819043	0.121675	0.682074	0.204395	1369	1
	UPI	Total		0.497946	0.174238	0.610847	0.192879	1007	0
		Guild	Carnivore	0.495697	0.0865316	0.615478	0.17009	1007	0
			Frugivore	0.518483	0.1675	0.629192	0.194415	1007	0
			Gleaner	0.515716	0.0832919	0.61173	0.190153	1007	0
			Hematophagous	0.550401	0.153284	0.583233	0.177135	1007	0
			Insectivorous	0.491109	0.20093	0.606807	0.204368	1007	0
			Nectarivore	0.647796	0.144432	0.628635	0.170779	1007	0.9996
			Insectivorous*	0.472552	0.200625	0.58601	0.20368	1007	0
		IUCN	DD	0.689679	0.167656	0.714519	0.170581	1007	0
			EN	0.92416	0.101304	0.772714	0.207928	1007	1
			LC	0.440867	0.162355	0.577363	0.20102	1007	0
			NT	0.812394	0.142022	0.682072	0.204378	1007	1
	TI	Total		0.466287	0.0976995	0.610731	0.192901	1171	0
		Guild	Carnivore	0.489862	0.0841809	0.615521	0.170073	1171	0
			Frugivore	0.481545	0.117814	0.629168	0.194428	1171	0
			Gleaner	0.525578	0.0708605	0.611814	0.190142	1171	0
			Hematophagous	0.589814	0.140811	0.583261	0.177214	1171	0.89989
			Insectivorous	0.461793	0.117402	0.606908	0.204401	1171	0
			Nectarivore	0.597705	0.0961537	0.628653	0.170724	1171	0
			Insectivorous*	0.40969	0.108968	0.585977	0.203626	1171	0
		IUCN	DD	0.642583	0.100356	0.714473	0.170599	1171	0
			EN	0.904644	0.0428733	0.772864	0.20788	1171	1
			LC	0.415783	0.113022	0.577365	0.201046	1171	0
			NT	0.666609	0.183509	0.68199	0.204373	1171	0.00420042
Mata Atlântica	UUS+UPI+TI	Total		0.712871	0.219796	0.610693	0.192892	2892	1
		Guild	Carnivore	0.5481	0.130665	0.615435	0.170112	2892	0
			Frugivore	0.729094	0.179966	0.629236	0.194415	2892	1
			Gleaner	0.555409	0.207058	0.611719	0.190169	2892	0
			Hematophagous	0.676585	0.259976	0.58321	0.177246	2892	1
			Insectivorous	0.675752	0.241826	0.606817	0.204378	2892	1
			Nectarivore	0.633943	0.259159	0.628614	0.170783	2892	0.954695
			Insectivorous*	0.697969	0.234244	0.585943	0.203673	2892	1
		IUCN	DD	0.716688	0.160614	0.71444	0.170578	2892	0.766077
			EN	0.702788	0.334615	0.772728	0.208022	2892	0
			LC	0.693918	0.219955	0.577472	0.201011	2892	1
			NT	0.854836	0.11681	0.682099	0.204365	2892	1
	UUS	Total		0.696827	0.231254	0.610667	0.192906	1427	1
		Guild	Carnivore	0.545158	0.129523	0.615494	0.170099	1427	0
			Frugivore	0.722516	0.186537	0.629223	0.194388	1427	1
			Gleaner	0.564714	0.207873	0.611734	0.190239	1427	0
			Hematophagous	0.685203	0.250589	0.583212	0.177188	1427	1
			Insectivorous	0.652042	0.252627	0.606845	0.204351	1427	1
			Nectarivore	0.628659	0.263457	0.62865	0.170705	1427	0.494849
			Insectivorous*	0.672204	0.244476	0.585978	0.203603	1427	1
		IUCN	DD	0.718613	0.173198	0.714464	0.170582	1427	0.825983
			EN	0.724022	0.320561	0.772739	0.207967	1427	0
			LC	0.675868	0.227969	0.577392	0.200991	1427	1
			NT	0.858642	0.11844	0.682089	0.204351	1427	1
	UPI	Total		0.755262	0.199175	0.610698	0.192898	1190	1
		Guild	Carnivore	0.55775	0.13773	0.615528	0.170091	1190	0
			Frugivore	0.756635	0.16949	0.629326	0.194422	1190	1
			Gleaner	0.568147	0.203658	0.611627	0.190144	1190	0
			Hematophagous	0.701001	0.265903	0.583201	0.177226	1190	1
			Insectivorous	0.717778	0.224393	0.606854	0.204373	1190	1
			Nectarivore	0.67833	0.247688	0.628608	0.170795	1190	1
			Insectivorous*	0.741168	0.216892	0.585852	0.203625	1190	1
		IUCN	DD	0.724328	0.150157	0.714473	0.170598	1190	0.979398
			EN	0.692946	0.358124	0.772767	0.207974	1190	0
			LC	0.736576	0.202738	0.577363	0.201059	1190	1
			NT	0.853462	0.118248	0.682079	0.204351	1190	1
	TI	Total		0.612686	0.200096	0.610634	0.192826	275	0.568357
		Guild	Carnivore	0.521612	0.0967689	0.615496	0.170134	275	0
			Frugivore	0.644055	0.158748	0.629209	0.194332	275	0.892289
			Gleaner	0.452003	0.188682	0.611488	0.190004	275	0
			Hematophagous	0.526213	0.232009	0.583159	0.177041	275	0
			Insectivorous	0.616925	0.22872	0.606709	0.204347	275	0.793979
			Nectarivore	0.469288	0.212787	0.628512	0.170622	275	0
			Insectivorous*	0.644736	0.222127	0.585953	0.203684	275	1
		IUCN	DD	0.673639	0.12686	0.714381	0.17053	275	0.00010001
			EN	0.635196	0.287549	0.772784	0.207488	275	0
			LC	0.602991	0.209131	0.57735	0.201016	275	0.983398
			NT	0.841029	0.100034	0.681959	0.204285	275	1
Pampa	UUS+UPI+TI	Total		0.356437	0.0924257	0.610611	0.192759	157	0
		Guild	Carnivore	0.26759	0.127694	0.615201	0.169984	157	0
			Frugivore	0.38476	0.101586	0.629105	0.194186	157	0
			Gleaner	0.184202	0.071121	0.611555	0.189943	157	0
			Hematophagous	0.165304	0.115587	0.583154	0.176816	157	0
			Insectivorous	0.399769	0.135872	0.606915	0.204198	157	0
			Nectarivore	0.239818	0.110361	0.628351	0.170714	157	0
			Insectivorous*	0.375931	0.141966	0.585953	0.203491	157	0
		IUCN	DD	0.409463	0.16524	0.714401	0.170377	157	0
			EN	0.232393	0.251948	0.772503	0.207412	157	0
			LC	0.36243	0.0936093	0.57745	0.200862	157	0
			NT	0.635279	0.0526741	0.681864	0.204246	157	0.00230023
	UUS	Total		0.391119	0.0577945	0.610639	0.192456	76	0
		Guild	Carnivore	0.327199	0.0894933	0.615351	0.169498	76	0
			Frugivore	0.414495	0.0300823	0.628963	0.19417	76	0
			Gleaner	0.223037	0.0627366	0.611805	0.189653	76	0
			Hematophagous	0.233981	0.100879	0.582964	0.176796	76	0
			Insectivorous	0.441211	0.0920403	0.607011	0.204142	76	0
			Nectarivore	0.275184	0.0634517	0.628644	0.17017	76	0
			Insectivorous*	0.421615	0.0956124	0.585771	0.203441	76	0
		IUCN	DD	0.499914	0.0800087	0.714523	0.17026	76	0
			EN	0.363628	0.24869	0.772465	0.206212	76	0
			LC	0.384461	0.053133	0.57705	0.200575	76	0
			NT	0.639808	0.026733	0.681778	0.204124	76	0.0351035
	UPI	Total		0.323022	0.10772	0.610628	0.192809	72	0
		Guild	Carnivore	0.213197	0.133314	0.615239	0.169689	72	0
			Frugivore	0.349138	0.136543	0.628943	0.194112	72	0
			Gleaner	0.147938	0.0590253	0.611995	0.1897	72	0
			Hematophagous	0.103479	0.0912603	0.582828	0.176827	72	0
			Insectivorous	0.362143	0.162512	0.60698	0.203983	72	0
			Nectarivore	0.210695	0.133339	0.628855	0.170127	72	0
			Insectivorous*	0.334356	0.167843	0.586031	0.203343	72	0
		IUCN	DD	0.318427	0.182584	0.714587	0.170157	72	0
			EN	0.11268	0.190505	0.77287	0.205902	72	0
			LC	0.340621	0.118651	0.577297	0.200749	72	0
			NT	0.630299	0.0705946	0.681847	0.204163	72	0.0175018
	TI	Total		0.330885	0.100363	0.609918	0.189817	9	0
		Guild	Carnivore	0.199371	0.139746	0.6159	0.166381	9	0
			Frugivore	0.418644	0.07857	0.629726	0.190577	9	0.00030003
			Gleaner	0.146379	0.0551642	0.61188	0.185977	9	0
			Hematophagous	0.0799675	0.061689	0.582936	0.171885	9	0
			Insectivorous	0.350817	0.120122	0.60758	0.200458	9	0
			Nectarivore	0.174151	0.132656	0.629162	0.166072	9	0
			Insectivorous*	0.322758	0.136829	0.584041	0.200702	9	0
		IUCN	DD	0.373936	0.151085	0.71506	0.166969	9	0
			EN	0.0818832	0.133544	0.773634	0.190704	9	0
			LC	0.350869	0.102084	0.576921	0.1974	9	0.00020002
			NT	0.636874	0.0524764	0.681724	0.20151	9	0.264026
Pantanal	UUS+UPI+TI	Total		0.562649	0.0536884	0.610888	0.192802	181	0.00020002
		Guild	Carnivore	0.500566	0.0409852	0.615472	0.170071	181	0
			Frugivore	0.552906	0.0612567	0.629246	0.19439	181	0
			Gleaner	0.642134	0.0724978	0.611532	0.189831	181	0.984598
			Hematophagous	0.662507	0.0328299	0.583326	0.177026	181	1
			Insectivorous	0.653953	0.0871095	0.606824	0.204282	181	0.9992
			Nectarivore	0.433587	0.0688376	0.628751	0.170483	181	0
			Insectivorous*	0.580554	0.0839364	0.586	0.203634	181	0.360336
		IUCN	DD	0.592275	0.0777549	0.714643	0.170408	181	0
			EN	0.851447	0.05443	0.772962	0.206898	181	1
			LC	0.550282	0.0563719	0.577376	0.200915	181	0.0329033
			NT	0.756332	0.0805151	0.682166	0.204264	181	1
	UUS	Total		0.55646	0.0425939	0.610196	0.19233	35	0.0487049
		Guild	Carnivore	0.500765	0.0318698	0.615812	0.169401	35	0
			Frugivore	0.537299	0.049373	0.629597	0.19376	35	0.00230023
			Gleaner	0.623878	0.0796335	0.612147	0.189647	35	0.639064
			Hematophagous	0.671239	0.012919	0.582599	0.176241	35	0.9987
			Insectivorous	0.631552	0.0725135	0.607156	0.203894	35	0.758776
			Nectarivore	0.474847	0.0660061	0.62861	0.169621	35	0
			Insectivorous*	0.555722	0.0632154	0.585702	0.203038	35	0.193419
		IUCN	DD	0.648475	0.0711498	0.714787	0.169439	35	0.0112011
			EN	0.881149	0.027039	0.772289	0.204326	35	0.9999
			LC	0.530278	0.0446083	0.577108	0.200521	35	0.0862086
			NT	0.780826	0.0678717	0.682253	0.204221	35	0.9982
	UPI	Total		0.548001	0.0528865	0.61066	0.192553	83	0.00110011
		Guild	Carnivore	0.48532	0.0313976	0.615381	0.169953	83	0
			Frugivore	0.533204	0.0491167	0.629215	0.194243	83	0.00010001
			Gleaner	0.647235	0.065698	0.611793	0.189659	83	0.956296
			Hematophagous	0.67677	0.0124573	0.583271	0.176634	83	1
			Insectivorous	0.644431	0.0614837	0.606679	0.204193	83	0.951095
			Nectarivore	0.429881	0.0597339	0.62821	0.170383	83	0
			Insectivorous*	0.566012	0.0608523	0.585592	0.203377	83	0.193719
		IUCN	DD	0.555553	0.073972	0.714292	0.170178	83	0
			EN	0.863257	0.0243695	0.773049	0.206055	83	1
			LC	0.545531	0.0489308	0.577768	0.200715	83	0.0760076
			NT	0.719842	0.0879295	0.682351	0.204159	83	0.952195
	TI	Total		0.585386	0.0532921	0.610411	0.192654	63	0.152915
		Guild	Carnivore	0.520542	0.0479512	0.615537	0.169734	63	0
			Frugivore	0.587534	0.0670147	0.629014	0.194095	63	0.0464046
			Gleaner	0.645554	0.0764076	0.611679	0.189669	63	0.922392
			Hematophagous	0.638864	0.0441472	0.58295	0.176423	63	0.994299
			Insectivorous	0.678943	0.114488	0.606736	0.203999	63	0.9971
			Nectarivore	0.415548	0.0730673	0.628388	0.17007	63	0
			Insectivorous*	0.613507	0.107845	0.585831	0.203103	63	0.853085
		IUCN	DD	0.609433	0.0604314	0.714421	0.169958	63	0
			EN	0.819387	0.0754033	0.772675	0.205776	63	0.968497
			LC	0.567655	0.0663722	0.577086	0.200503	63	0.348135
			NT	0.790799	0.0523502	0.682284	0.204222	63	0.9999
