# Supplementary material for: ¿Y ahora, quién podrá defendernos? The Inefficacy of Brazilian Conservation Areas in Safeguarding Bat Biodiversity
Source: Research Square preprint supplement (doi:10.21203/rs.3.rs-3731080/v1), 2023-12-13
Supplement: Supplementary file 1 [file 67cd53360cf00a88e132b083.docx]

## **Procedures for species modeling**

## **Environmental variables**

We used 19 bioclimatic variables (resolution of 9.4 x 9.4 km) for the neotropical region, obtained from the WorldClim database (http://www.worldclim.org/). These variables include: Mean annual temperature; Monthly mean diurnal temperature range; Isothermality; Temperature seasonality; Maximum temperature of the warmest month; Minimum temperature of the coldest month; Annual temperature range; Mean temperature of the wettest quarter; Mean temperature of the warmest quarter; Mean temperature of the coldest quarter; Annual precipitation; Precipitation of the wettest month; Precipitation of the driest month; Precipitation seasonality; Precipitation of the driest quarter; Precipitation of the wettest quarter; Precipitation of the warmest quarter; Precipitation of the coldest quarter.

## The obtained data are part of the group of monthly climate variables sampled between 1970-2000 from WorldClim version 2.1 (Fick and Hijmans, 2017). These data are frequently used for Species Distribution Modeling (SDM) to assess the potential distribution of species (Lee et al., 2012). To reduce multicollinearity in our dataset, we performed a Principal Component Analysis (PCA) (Legendre and Legendre, 2012) and used the eigenvalues as environmental variables. Then, we selected only the axes that represent an explanation equal to or greater than 95% (De Marco and Nóbrega, 2018), using these axes as model variables.

## **Algorithms**

For the creation of SDMs, four algorithms were used: Maxent (MXE) (Phillips et al., 2017), Random Forest (RDF) (Prasad et al., 2006), Support Vector Machine (SVM) (Guo et al., 2005), and Bayesian Gaussian (GAU) (Golding and Bolsa, 2016). An ensemble combining the final suitability maps was generated by the four algorithms to minimize model uncertainties (Araújo and New, 2007; Diniz-Filho et al., 2009). To mitigate model uncertainties, an ensemble approach was adopted as the final model (Velazco et al., 2019, Pimenta et al., 2022). This ensemble model consists of the average suitability across models for which the Jaccard threshold values (Pimenta et al., 2022) were greater than the average thresholds for each species (Velazco et al., 2019). The Jaccard threshold was selected to minimize omission and commission errors in the models (Pimenta et al., 2022). Additionally, we applied spatial restrictions to the models to minimize overprediction in distribution models (Mendes et al., 2020; Pimenta et al., 2022). To do this, we created a binary occurrence map, where suitability values greater than the Jaccard threshold indicated species presence, and then partitioned it into pixels with species occurrence and pixels without species occurrence.

## Subsequently, only pixels where the species was predicted and had species records or pixels where the species was predicted and were near pixels with predictions and occurrence points were retained in the species' potential distribution map (Pimenta et al., 2022). For the partitioning of the binary map, we considered two methods: 1) Species with more than 30 occurrence points – partitioning the map using the chessboard method (De Andrade, Velazco, & Júnior, 2020); 2) Species with fewer than 30 points – Randomly selecting a percentage of points for modeling and another for evaluation, with 70% of the points selected for the model and 30% for evaluation (Pimenta et al., 2022). Since spatial restriction generates more conservative maps, limiting the occurrence areas to locations near or with species occurrence, we conducted a second modeling without spatial restriction. Thus, we have a more restrictive and conservative model (model with spatial restriction) and a less conservative model containing areas with environmental suitability without considering whether the species occurs or not. All procedures were performed using the enmtml function implemented in the ENMTL package (Andrade et al., 2020) for the R environment (R Development Core Team 2010).

**Model Evaluation**

The evaluation was performed using Receiver Operating Characteristic (ROC) curves, and the efficiency of each model was assessed using the True Skill Statistic (TSS) test, which has been widely advocated as an appropriate discrimination metric that is independent of prevalence (ALLOUCHE et al., 2006; SHABANI et al., 2018). TSS is an intuitive method for measuring the performance of Species Distribution Models (SDMs), which calculates sensitivity (true positive rate, TPR) and specificity (true negative rate, TNR) values, where predictions are expressed as presence-absence maps. This test slightly restricts the occurrence area, leading to a less inclusive map, considering errors of omission in species distribution (false negatives) and commission (false positives), with values ranging from -1 to +1 (Sensitivity + Specificity) to indicate the predictive ability of the models. Models with TSS values close to +1 reflect good predictive ability, models with TSS values between 0.2 and 0.6 are considered fair to moderate, and models with TSS values close to 0 or negative indicate low capability.

However, TSS values can be misleading when the number of true negatives assigns higher values to species with lower prevalence (LAWSON et al., 2014). To avoid these deficiencies, we propose focusing the evaluation metrics on three components of the confusion matrix: true positives, false positives, and false negatives, neglecting true negatives that could inflate the data. In other words, we aim to maximize true positives while minimizing false positives and false negatives relative to true positives (LEROY et al., 2018).
